# Supplementary material for: Genetic Analysis of Human Traits In Vitro: Drug Response and Gene Expression in Lymphoblastoid Cell Lines
Source: PubMed Central journal article supplement (PMC2583954; doi:10.1371/journal.pgen.1000287), 2008-11-28

# Winner's curse: 198 samples, detection at $r^2=0.08$

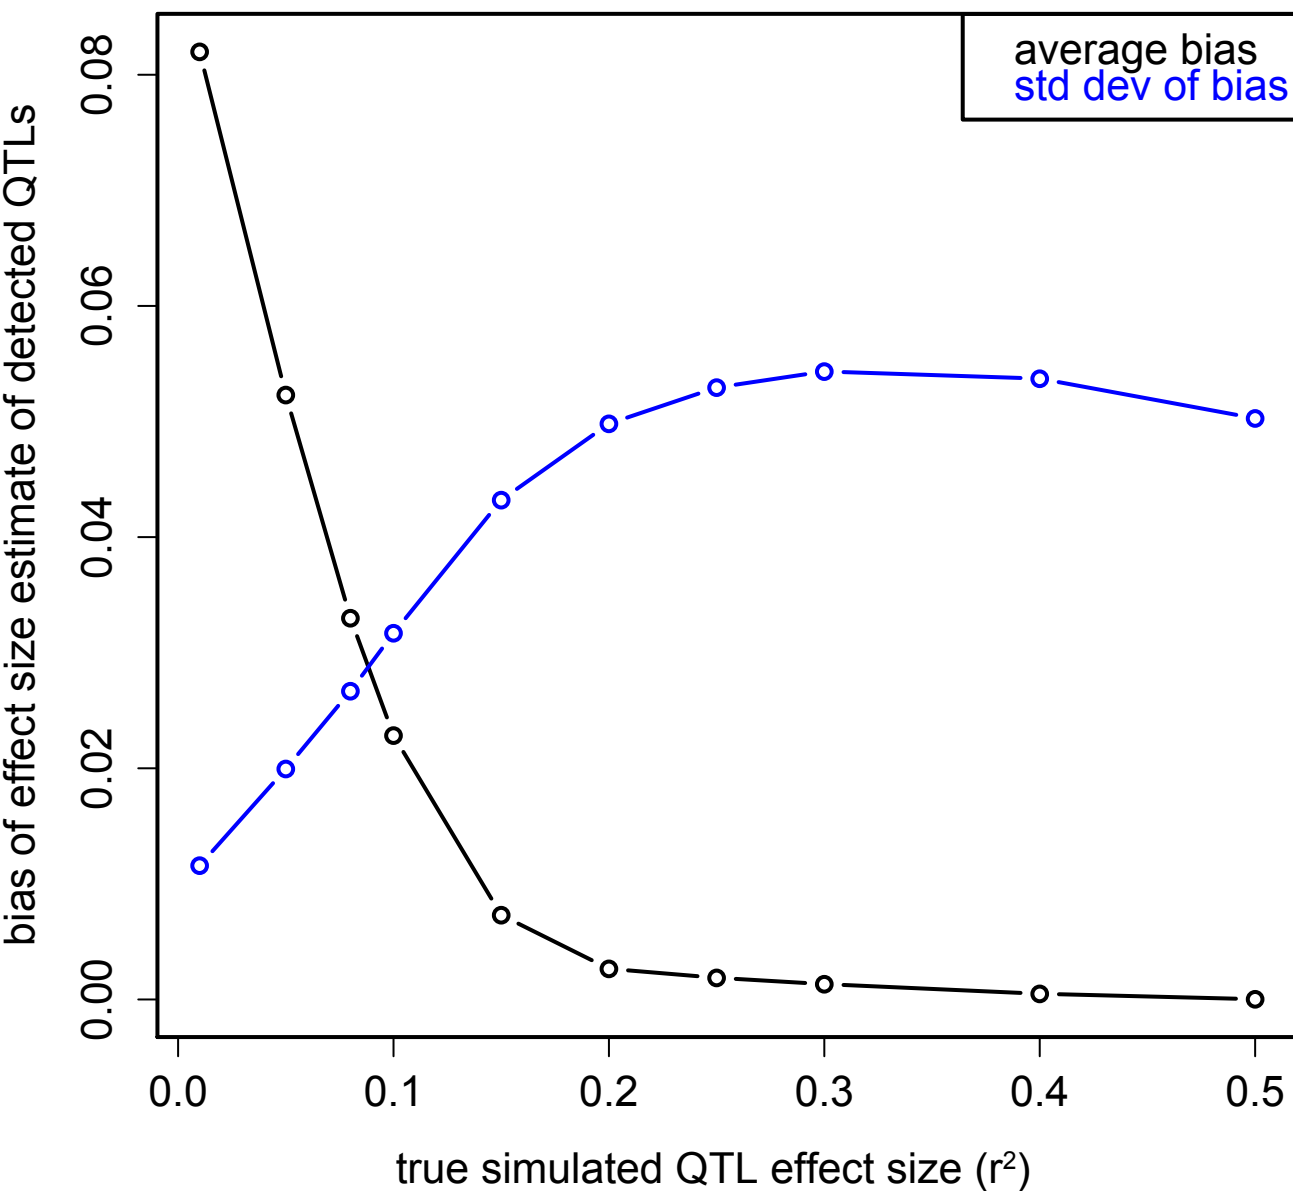

Supplement: pgen.1000287.s004.pdf [file pgen.1000287.s004.pdf]
