# Supplementary material for: Genetic Analysis of Human Traits In Vitro: Drug Response and Gene Expression in Lymphoblastoid Cell Lines
Source: PubMed Central journal article supplement (PMC2583954; doi:10.1371/journal.pgen.1000287), 2008-11-28
Supplement: pgen.1000287.s005.pdf [file pgen.1000287.s005.pdf]

| <b>Compound</b> | <b>rho</b> | <b>rho<sup>2</sup></b> | <b>pval</b> |
|-----------------|------------|------------------------|-------------|
| MTX             | 0.98831    | 0.976749               | <2.20e-16   |
| 5FU             | 0.97217    | 0.945105               | <2.20e-16   |
| 6MP             | 0.94395    | 0.891043               | <2.20e-16   |
| Simva           | 0.91629    | 0.839582               | <2.20e-16   |
| Saha            | 0.85846    | 0.736949               | <2.20e-16   |
| velcade         | 0.88812    | 0.788753               | <2.20e-16   |
| rapa            | 0.91968    | 0.845818               | <2.20e-16   |
