# Supplementary material for: Genetic Analysis of Human Traits In Vitro: Drug Response and Gene Expression in Lymphoblastoid Cell Lines
Source: PubMed Central journal article supplement (PMC2583954; doi:10.1371/journal.pgen.1000287), 2008-11-28
Supplement: pgen.1000287.s006.pdf [file pgen.1000287.s006.pdf]

| <b>Compound</b> | <b>rho</b> | <b>rho<sup>2</sup></b> | <b>pval</b> |
|-----------------|------------|------------------------|-------------|
| MTX             | 0.82       | 0.67                   | 1.2E-15     |
| 5FU             | 0.63       | 0.39                   | 6.6E-08     |
| 6MP             | 0.66       | 0.43                   | 9.7E-09     |
| Simva           | 0.39       | 0.15                   | 2.0E-03     |
| Saha            | 0.71       | 0.50                   | 2.0E-10     |
