# Supplementary material for: Genetic Analysis of Human Traits In Vitro: Drug Response and Gene Expression in Lymphoblastoid Cell Lines
Source: PubMed Central journal article supplement (PMC2583954; doi:10.1371/journal.pgen.1000287), 2008-11-28
Supplement: pgen.1000287.s007.pdf [file pgen.1000287.s007.pdf]

| Relative Drug Response | MTX                     | 6MP          | 5FU              | Simva          | Saha         |
|------------------------|-------------------------|--------------|------------------|----------------|--------------|
| MTX                    | <u>rank correlation</u> | 2.20E-16     | 2.20E-16         | 1.14E-08       | 0.00977      |
| 6MP                    | 0.78                    | <u>below</u> | 2.20E-16         | 7.44E-05       | 0.00127      |
| 5FU                    | 0.78                    | 0.61         | <u>diagonal,</u> | 4.68E-14       | 1.26E-06     |
| Simva                  | 0.36                    | 0.25         | 0.46             | <u>p-value</u> | 1.97E-04     |
| Saha                   | 0.16                    | 0.2          | 0.3              | 0.23           | <u>above</u> |

pvalues <.001 marked in red

#### Correlation to Growth Rate of relative drug response

| Drug             | MTX      | 6MP      | 5FU      | Simva | Saha  |
|------------------|----------|----------|----------|-------|-------|
| Rank Correlation | -0.34    | -0.31    | -0.3     | -0.15 | 0.04  |
| P-value          | 1.86E-07 | 3.21E-06 | 7.61E-06 | 0.031 | 0.603 |

pvalues <.001 marked in red
