# Supplementary material for: Genetic Analysis of Human Traits In Vitro: Drug Response and Gene Expression in Lymphoblastoid Cell Lines
Source: PubMed Central journal article supplement (PMC2583954; doi:10.1371/journal.pgen.1000287), 2008-11-28
Supplement: pgen.1000287.s008.pdf [file pgen.1000287.s008.pdf]

| Growth-corrected EC50 Drug Response | MTX                     | 6MP          | 5FU              | Simva          | Saha         |
|-------------------------------------|-------------------------|--------------|------------------|----------------|--------------|
| MTX                                 | <u>rank correlation</u> | 0.02         | 1.74E-09         | 2.27E-11       | 0.174        |
| 6MP                                 | 0.14                    | <u>below</u> | 0.0165           | 0.973          | 0.0524       |
| 5FU                                 | 0.37                    | 0.15         | <u>diagonal,</u> | 0.00863        | 1.54E-04     |
| Simva                               | 0.41                    | 0.0021       | 0.17             | <u>p-value</u> | 0.118        |
| Saha                                | 0.09                    | 0.12         | 0.24             | 0.1            | <u>above</u> |

pvalues <.001 marked in red

**Correlation to Growth Rate of EC50/Growth-corrected drug responses**

| Drug             | MTX  | 6MP  | 5FU     | Simva  | Saha  |
|------------------|------|------|---------|--------|-------|
| Rank Correlation | -0.1 | 0.06 | -0.24   | -0.14  | 0.06  |
| P-value          | 0.14 | 0.4  | 0.00034 | 0.0356 | 0.345 |

pvalues <.001 marked in red
