# Supplementary material for: Genetic Analysis of Human Traits In Vitro: Drug Response and Gene Expression in Lymphoblastoid Cell Lines
Source: PubMed Central journal article supplement (PMC2583954; doi:10.1371/journal.pgen.1000287), 2008-11-28
Supplement: pgen.1000287.s009.pdf [file pgen.1000287.s009.pdf]

**Growth and  
ATP-Corrected  
Drug Response**

|              | MTX                         | 6MP          | 5FU              | Simva          | Saha         |
|--------------|-----------------------------|--------------|------------------|----------------|--------------|
| <b>MTX</b>   | <u>rank<br/>correlation</u> | 0.041        | 0.008            | 2.06E-08       | 0.703        |
| <b>6MP</b>   | 0.15                        | <u>below</u> | 0.003            | 0.973          | 0.052        |
| <b>5FU</b>   | 0.19                        | 0.22         | <u>diagonal,</u> | 0.291          | 0.006        |
| <b>Simva</b> | 0.40                        | 0.00         | 0.08             | <u>p-value</u> | 0.118        |
| <b>Saha</b>  | -0.03                       | 0.12         | 0.20             | 0.10           | <u>above</u> |

pvalues <.001 marked in red
